# Supplementary material
Source: PubMed Central journal article supplement (PMC4297224)
Supplement: NIHMS643306-supplement.pdf [file NIHMS643306-supplement.pdf]

Figure S1 (related to figures 1 and 3)

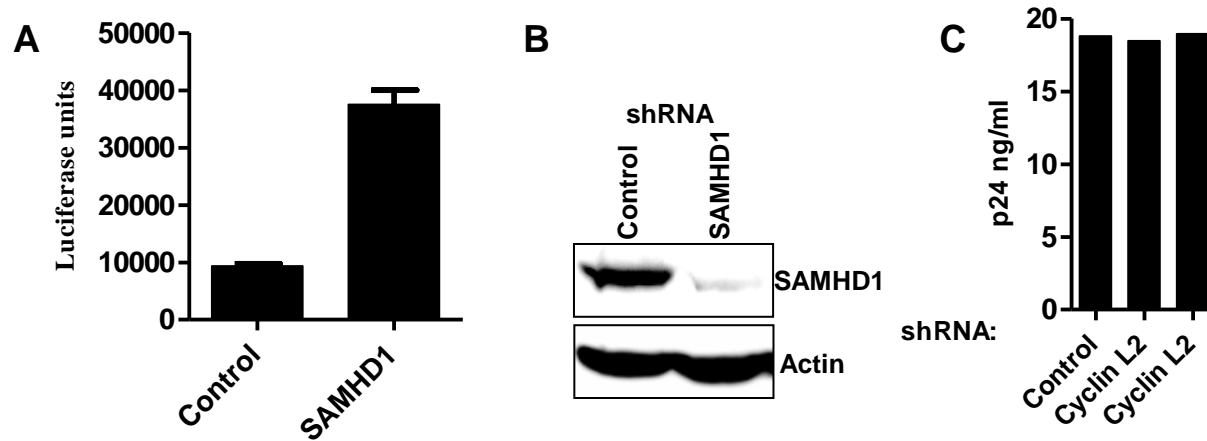

**(A)** THP-1 cells stably expressing the indicated or control shRNA were differentiated with PMA for 48h and infected with HIV-1Luc. After 2 days, cells were lysed for luciferase luminescence. Average of two independent experiments are shown. **(B)** Western blot showing SAMHD1 knockdown by shRNA in differentiated THP-1 cells. **(C)** Differentiated THP-1 cells were infected with HIV-1Luc for 2 h. Cells were washed vigorously three times, lysed and p24 ELISA performed on the cell lysates.

**Figure S2 (related to figure 2)**

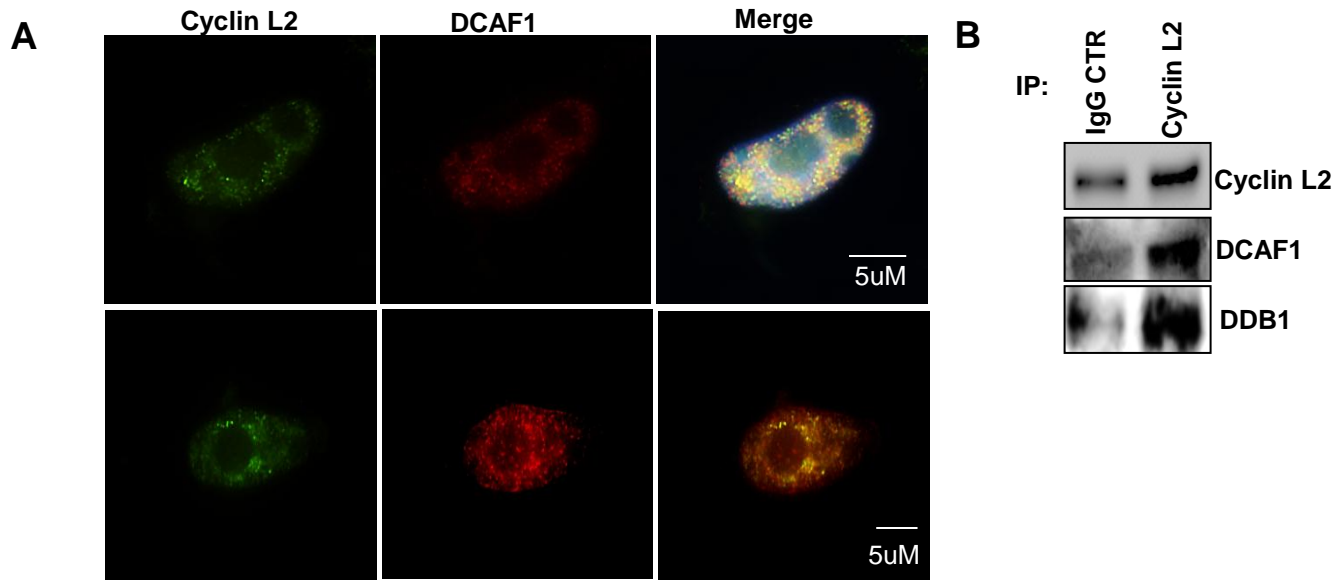

**(A)** Cyclin L2 and DCAF1 show partial colocalization in the nucleus. HeLa cells were transfected with myc-Cyclin L2 and stained for myc and endogenous DCAF1. Blue staining in the top panel represents DAPI **(B)** THP-1 cells were lysed and immunoprecipitation performed with Cyclin L2 antibody and Western blots probed for Cyclin L2, DCAF1 and DDB1.

**Figure S3 (related to figure 3)**

**Cyclin L2 does not affect HIV replication in HeLa and 293T cells**

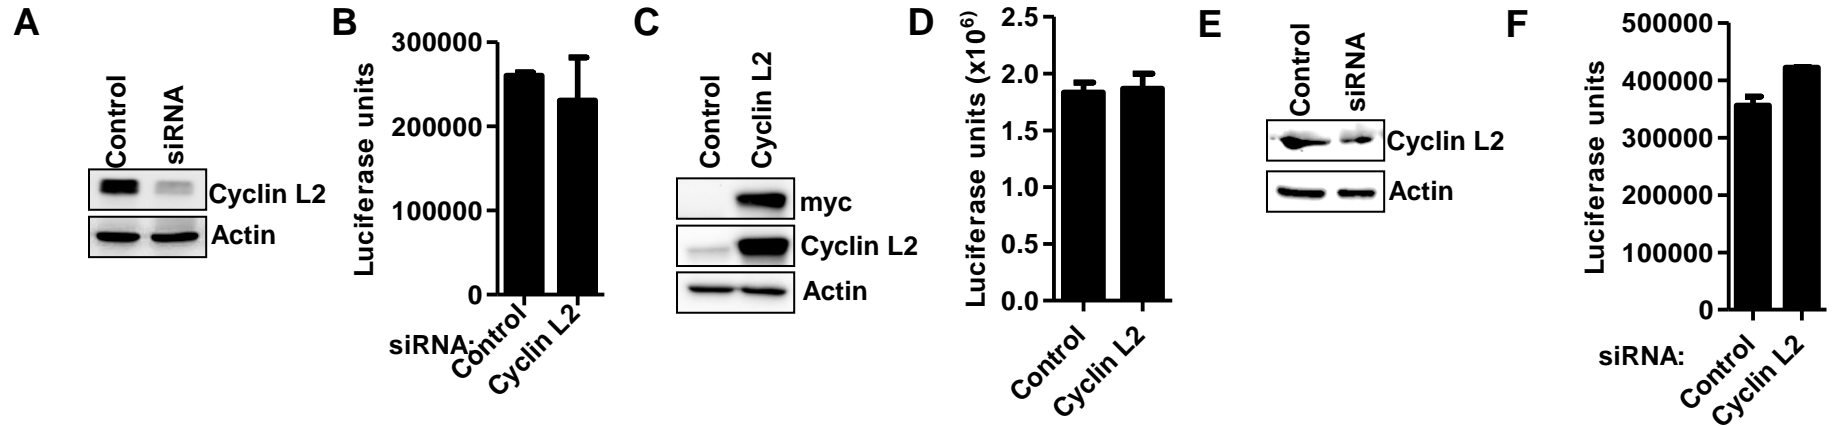

**(A)** 293T cells were transfected with control or siRNA to Cyclin L2 for 48h and WB performed. **(B)** 293T cell were transfected with control or Cyclin L2 siRNA. After 48h, cells were infected with HIV-1luc and viral replication determined by luciferase luminescence in cellular lysates **(C)** 293T cells were transfected with control or Cyclin L2 plasmid and Western blot performed after 48h. Antibodies to epitope tag (myc) and Cyclin L2 on the same blot are shown. **(D)** 293T cells transfected with Cyclin L2 or control plasmid for 48h were infected with HIV-1luc and viral replication measured by luciferase in cellular lysates **(E)** HeLa cells were transfected with control or siRNA to Cyclin L2 for 48h and WB performed **(F)** HeLa cells were transfected with control or Cyclin L2 siRNA. After 48h cells were infected with HIV-1luc and viral replication determined by luciferase luminescence in cellular lysates. Data indicate means; error bars indicate  $\pm$ SEM (n  $\geq$  3).

**Figure S4 (related to figure 4)**

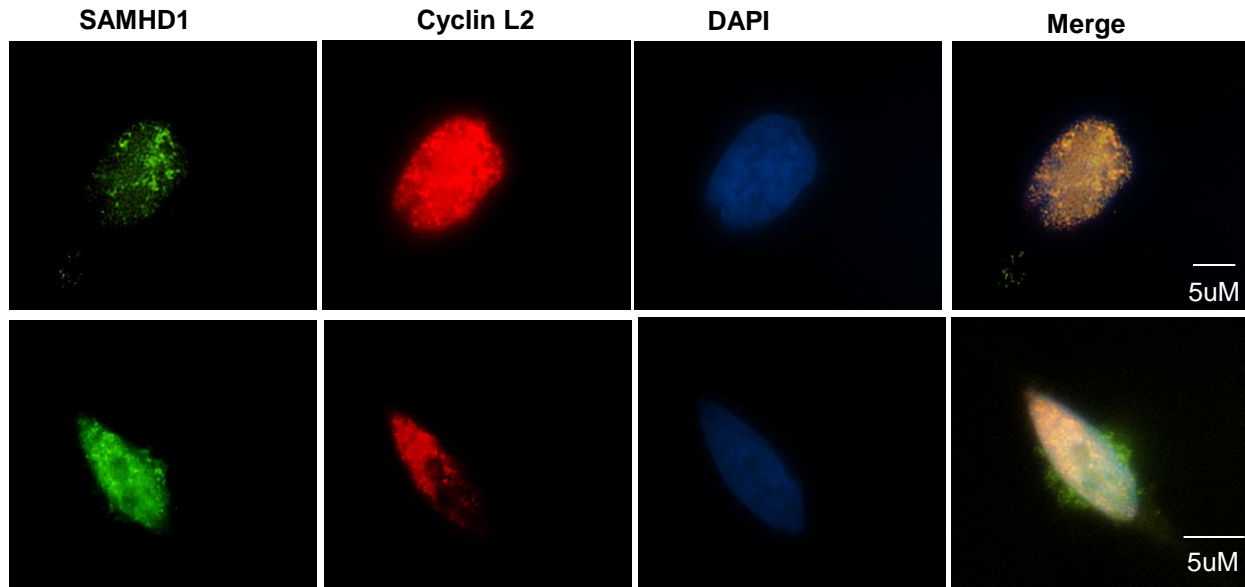

Cyclin L2 shows significant nuclear colocalization with SAMHD1. HeLa cells were transfected with SAMHD1 overnight and immunostained for SAMHD1 and endogenous Cyclin L2.

**Figure S5 (related to Figure 5)**

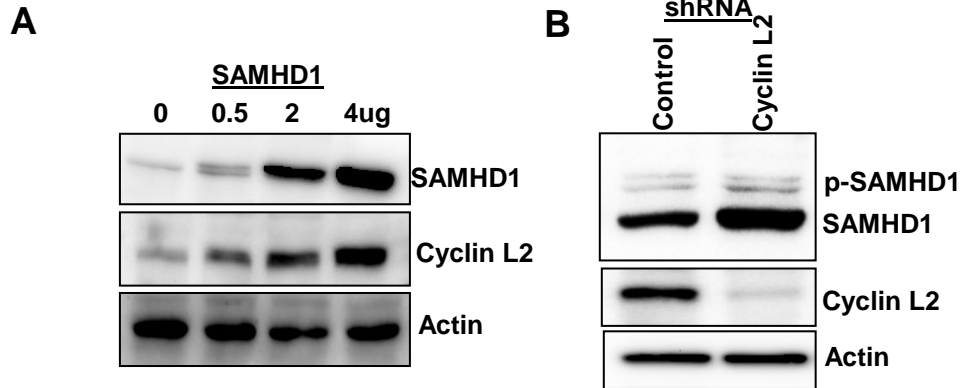

**(A)** 293T cells were transfected with increasing concentrations of SAMHD1 and 1ug of Cyclin L2 for 48h and the expression levels of the two proteins determined by Western blot. **(B)** Stable THP-1 cells expressing control or Cyclin L2 shRNA were differentiated for 48h in PMA and WB performed on a Phostag gel for SAMHD1 levels.
